# Supplementary material for: A robust, gravure-printed, silver nanowire/metal oxide hybrid electrode for high-throughput patterned transparent conductors
Source: Royal Society of Chemistry journal article supplement (doi:10.1039/c5tc04364f), 2016-01-01
Supplement: c5tc04364f1.pdf [file c5tc04364f1.pdf]

# Supporting Information for “A Robust, Gravure-Printed, Silver Nanowire/Metal Oxide Hybrid Electrode for High-Throughput Patterned Transparent Conductors”

*William J. Scheideler, Jeremy Smith, Igal Deckman, Seungjun Chung, Ana C. Arias, and*

*Vivek Subramanian\**

Department of Electrical Engineering and Computer Sciences

University of California, Berkeley

Berkeley, California 94720-1764, USA

E-mail: [viveks@eecs.berkeley.edu](mailto:viveks@eecs.berkeley.edu)

## Images of Gravure Printing Cylinder and Gravure Printer

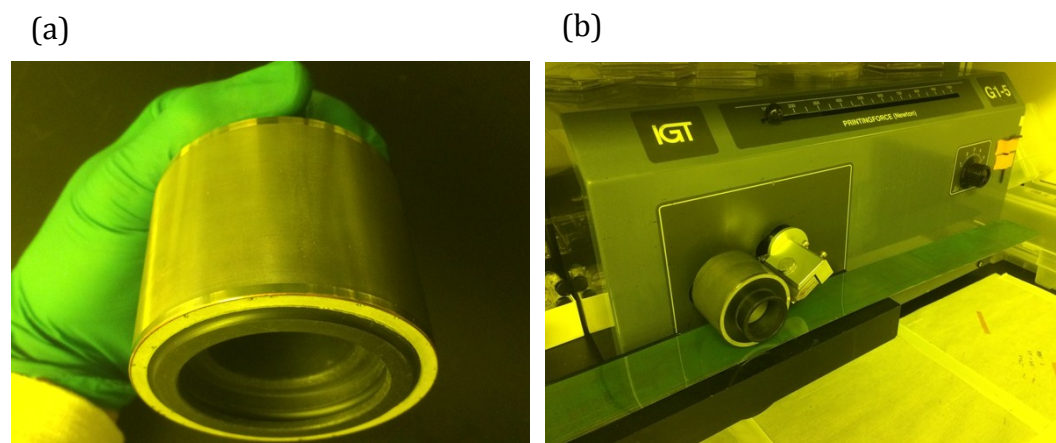

Figure S1 – Image of chrome-coated engraved copper gravure roller (a) and IGT G1-5 benchtop gravure printer (b).

## Thickness Measurements of Printed Composite Films:

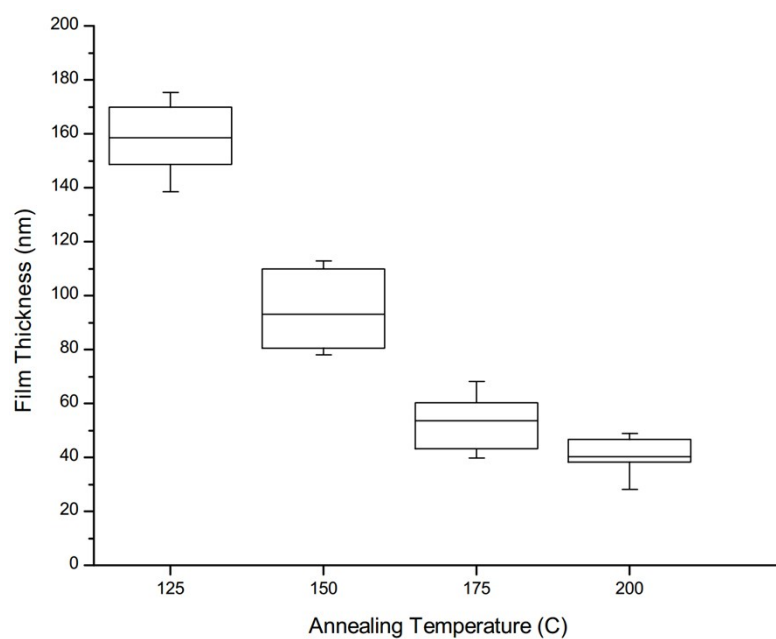

Figure S2 – Thickness of gravure-printed sol-gel IZO films measured by stylus profilometry vs annealing temperature.

### Optical Micrographs of printed NW Films:

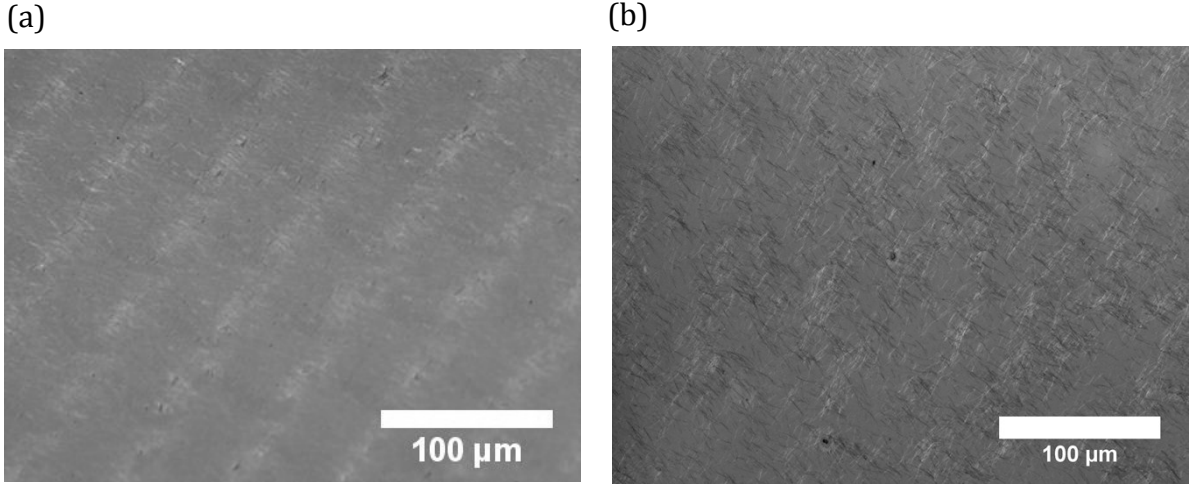

Figure S3 – Textured nanowire film printed from pure Ag NW solution (a). Hybrid film printed from IZO / Ag NW ink (b).

### Nanowire Network Modeling:

Each nanowire was modeled as having a resistance per unit length,  $r_{\text{length}}$ , given by,

$$r_{\text{length}} = \frac{4\rho_{\text{Ag}}}{\pi D^2}$$

where  $D$  is the nanowire diameter and  $\rho_{\text{Ag}}$  is the resistivity of the silver.

A random network of nanowires was then generated with various areal densities of wires,  $n$ , nanowire lengths and length distributions. See Figure S3 for examples of generated networks. Each nanowire start, end, and intersection with another wire was taken as a node for the network model. The resistance,  $r_{ij}$ , between node  $i$  and node  $j$  is modeled as,

$$r_{ij} = d_{ij}r_{\text{length}} + R_{\text{int}}$$

for nodes connected by a nanowire and,

$$r_{ij} = R_{\text{matrix}} \frac{N}{2}$$

for nodes connected by the matrix material. In these equations  $d_{ij}$  is the distance between nodes,  $R_{\text{int}}$  is the junction resistance between two nanowires,  $R_{\text{matrix}}$  is the sheet resistance of the matrix material, and  $N$  is the number of nodes.

The conductance matrix,  $c_{ij}$ , is generated from  $1/r_{ij}$  and the Laplacian matrix,  $\mathbf{L}$ , calculated as,

$$\mathbf{L} = c_i \mathbf{I} - c_{ij}$$

$$c_i \equiv \sum_{j=1}^N c_{ij}$$

The resistance between any two nodes  $\alpha$  and  $\beta$  is then given by,

$$R_{\alpha\beta} = \sum_{i=2}^N \frac{1}{l_i} |\varphi_{i\alpha} - \varphi_{i\beta}|^2$$

where  $l_i$  and  $\varphi_{ij}$  are the non-zero eigenvalues and eigenvectors of  $\mathbf{L}$ . Two-point resistances were then calculated for different nodes and different networks and averaged to provide an estimate of the sheet resistance of the composite.

The composite resistance was modeled for various values of  $n$ ,  $R_{\text{int}}$  and  $R_{\text{matrix}}$ . Materials parameters for the silver nanowires were taken from those used in the experimental films (see Table S1). For each condition 4 random networks and 6 two-point resistances were generated giving 24 values to average over. The modeled area of each nanowire network was  $50 \times 50 \mu\text{m}^2$  or  $100 \times 100 \mu\text{m}^2$ .

| Parameter                        | Value  | Unit                       |
|----------------------------------|--------|----------------------------|
| $\rho_{\text{Ag}}$               | 0.0159 | $\Omega \cdot \mu\text{m}$ |
| $D$                              | 0.033  | $\mu\text{m}$              |
| Average NW length                | 14     | $\mu\text{m}$              |
| Standard deviation of NW lengths | 4      | $\mu\text{m}$              |

Table S1 – Parameters used in nanowire network model

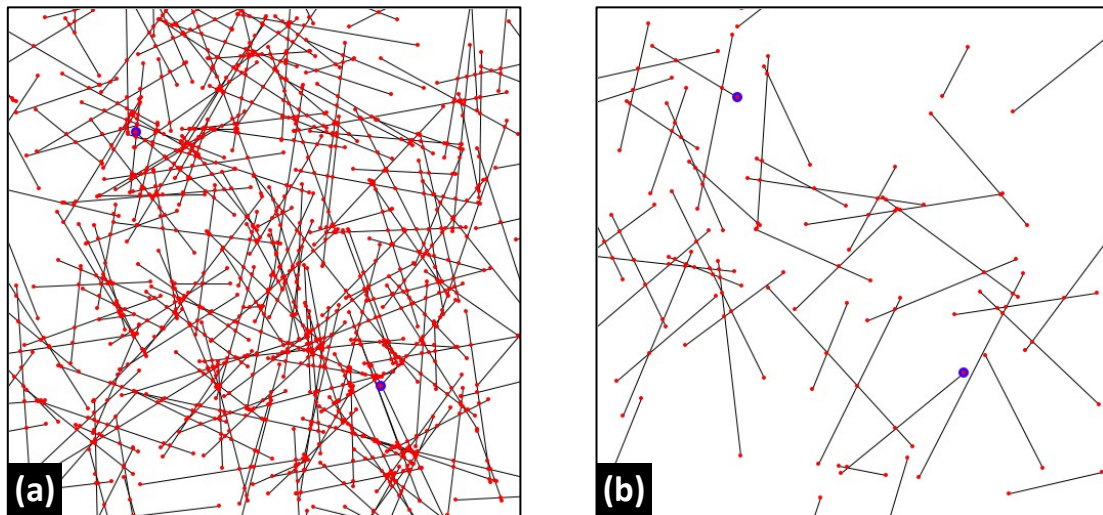

Figure S4 – Examples of nanowire networks generated using the described model. (a)  $n = 0.1 \mu\text{m}^{-2}$ , (b)  $n = 0.02 \mu\text{m}^{-2}$ . Substrate areas are  $50 \times 50 \mu\text{m}^2$  in both cases. Every node in the model is marked by a red dot; example 2-point resistance test nodes are also marked with blue dots.

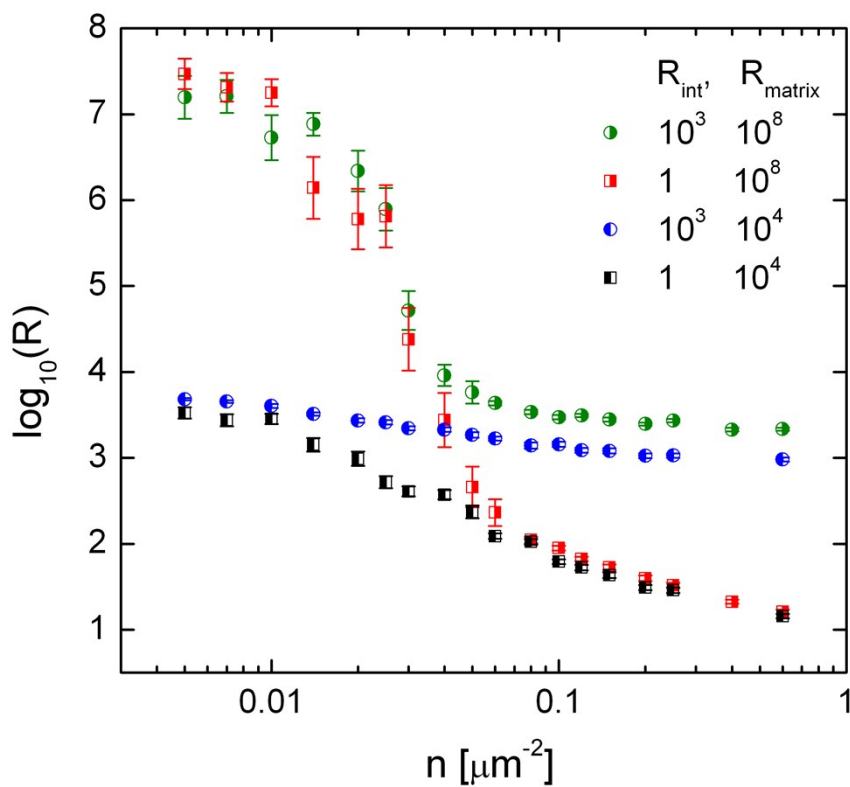

Figure S5 – Results of computational models for nanowire networks. The average resistance,  $R$ , is shown as a function of the areal density of wires,  $n$ , for four conditions with different matrix resistances,  $R_{matrix}$ , and junction resistances,  $R_{int}$ .

(a)

**Bare Ag NW Film**

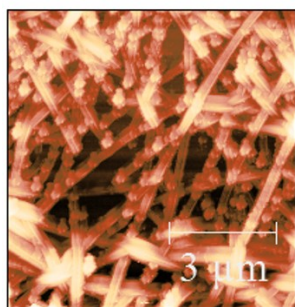

(b)

**IZO Composite Film**

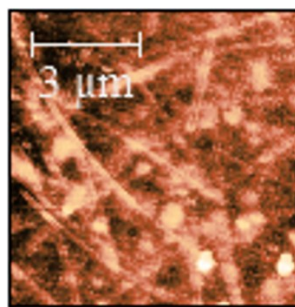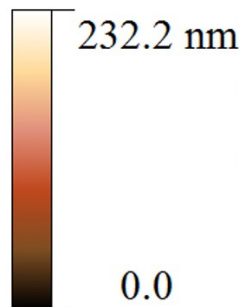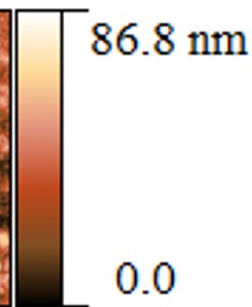

Figure S6 – AFM scans of gravure printed bare Ag NW films (a) and hybrid IZO / Ag NW films (b) printed from 5 mg/mL Ag NW mass-loading inks.
